# Supplementary material for: Carbamoyl-Phosphate Synthase 1 as a Novel Target of Phomoxanthone A, a Bioactive Fungal Metabolite
Source: MDPI journal article supplement (doi:10.3390/biom10060846), 2020-06-02
Supplement: s1 [file s1]

## Supporting information

# Carbamoyl-phosphate synthase 1 as a novel target of phomoxanthone A, a bioactive fungal metabolite.

Sara Ceccacci <sup>1,2</sup>, Jana Deitersen <sup>3</sup>, Matteo Mozzicafreddo <sup>4</sup>, Elva Morretta <sup>1</sup>, Peter Proksch <sup>5</sup>, Sebastian Wesselborg <sup>3</sup>, Björn Stork <sup>3</sup> and Maria Chiara Monti <sup>1,\*</sup>

- <sup>1</sup> Dept. of Pharmacy, Università di Salerno, Via Giovanni Paolo II 132, 84084 Fisciano, Salerno, Italy; [sceccacci@unisa.it](mailto:sceccacci@unisa.it) (S.C.); [emorretta@unisa.it](mailto:emorretta@unisa.it) (E.M.); [mcmonti@unisa.it](mailto:mcmonti@unisa.it) (M.C.M.).
- <sup>2</sup> PhD Program in Drug Discovery and Development, Dept. of Pharmacy, Università di Salerno, Via Giovanni Paolo II 132, 84084 Fisciano, Salerno, Italy; [sceccacci@unisa.it](mailto:sceccacci@unisa.it).
- <sup>3</sup> Institute of Molecular Medicine I, Medical Faculty, Heinrich Heine University Düsseldorf, Universitätsstr. 1, 40225 Düsseldorf, Germany; [jana.deitersen@uni-duesseldorf.de](mailto:jana.deitersen@uni-duesseldorf.de) (J.D.); [sebastian.wesselborg@uni-duesseldorf.de](mailto:sebastian.wesselborg@uni-duesseldorf.de) (S.W.); [bjoern.stork@uni-duesseldorf.de](mailto:bjoern.stork@uni-duesseldorf.de) (B.S.).
- <sup>4</sup> School of Biosciences and Veterinary Medicine, University of Camerino, Via Gentile III da Varano, 62032 Camerino, Italy; [matteo.mozzicafreddo@unicam.it](mailto:matteo.mozzicafreddo@unicam.it) (M.M.).
- <sup>5</sup> Institute of Pharmaceutical Biology and Biotechnology, Heinrich Heine University, Universitätsstr. 1, 40225 Düsseldorf, Germany; [Peter.Proksch@hhu.de](mailto:Peter.Proksch@hhu.de) (P.P.).
- \* Correspondence: [mcmonti@unisa.it](mailto:mcmonti@unisa.it).

**Table S1.** All proteins identified in two independent DARTS experiments together with the mean of their Mascot scores and matches. The ones in light gray are those for which both scores and matches increase when PXA is pre-incubated with the lysate in a concentration dependent mode.

| Accession   | Description                                 | CTRL  |         | PXA 1uM |         | PXA 10uM |         | PXA 100uM |         | Lysate |         |
|-------------|---------------------------------------------|-------|---------|---------|---------|----------|---------|-----------|---------|--------|---------|
|             |                                             | Score | Matches | Score   | Matches | Score    | Matches | Score     | Matches | Score  | Matches |
| THIL_HUMAN  | Acetyl-CoA acetyltransferase, mitochondrial | 1752  | 46      | 1786.5  | 49      | 2113     | 51      | 2174      | 55      | 2168   | 59.5    |
| ACON_HUMAN  | Aconitate hydratase, mitochondrial          | 1200  | 25      | 1619    | 38      | 1687     | 43      | 2379      | 50      | 2488.5 | 54      |
| CALX_HUMAN  | Calnexin                                    | 49    | 1       | 78      | 2       | 150      | 3       | 250       | 5       | 773    | 29.5    |
| CPSM_HUMAN  | Carbamoyl-phosphate synthase, mitochondrial | 1758  | 55.5    | 2450.5  | 71.5    | 3507.5   | 101.5   | 4332.5    | 126.5   | 4391   | 140     |
| ECI2_HUMAN  | Enoyl-CoA delta isomerase 2, mitochondrial  | 663   | 16      | 1090    | 25      | 310      | 11      | 325       | 10      | 265    | 6.5     |
| HS71A_HUMAN | Heat shock 70 kDa protein 1A                | 1090  | 25      | 1040    | 26      | 1061     | 26      | 1143      | 34      | 1161.5 | 34      |
| PREP_HUMAN  | Presequence protease, mitochondrial         | 199   | 8       | 293     | 15      | 360      | 13      | 236       | 14      | 176.5  | 8       |
| PDIA4_HUMAN | Protein disulfide-isomerase A4              | 120   | 3       | 184     | 6       | 154      | 6       | 152       | 3       | 106    | 2.5     |
| ROCK2_HUMAN | Rho-associated protein kinase 2             | 114.5 | 7       | 152     | 8.5     | 223.5    | 9.5     | 255.5     | 12      | 181.5  | 9       |
| SYVC_HUMAN  | Valine--tRNA ligase                         | 151   | 6       | 72      | 4       | 139      | 4       | 80        | 4       | 71.5   | 4.3     |

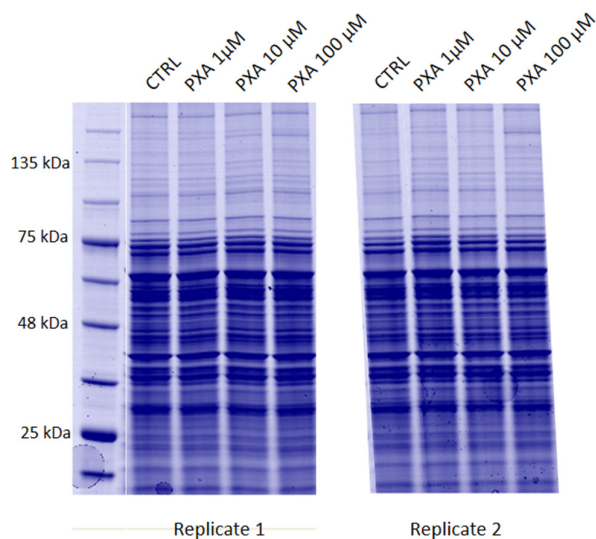

**Figure S1.** DARTS replicate experiments exploited for the densitometric analysis reported in Figure 1C. The left panel of this figure is reported in the manuscript as Figure 1B.

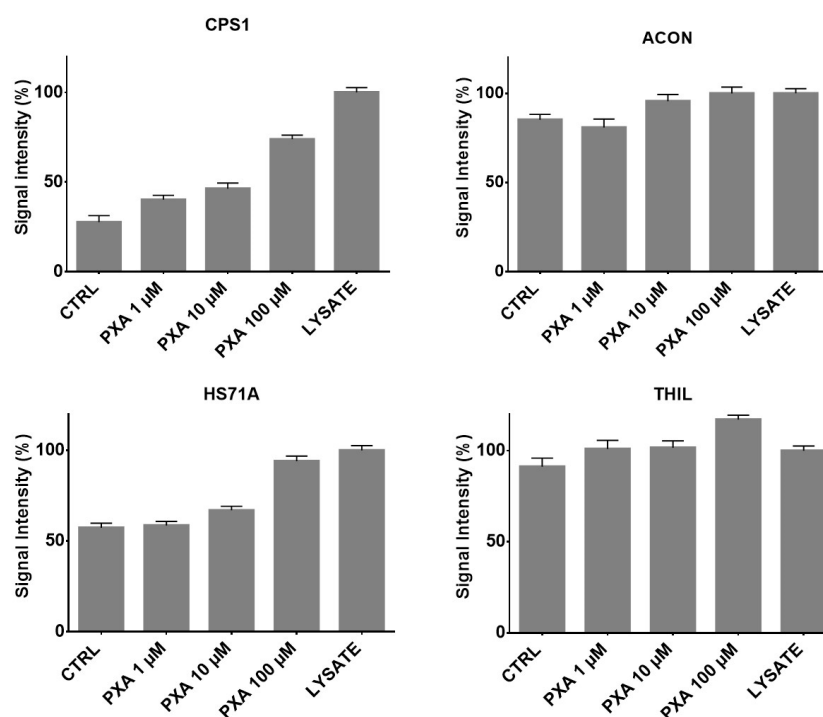

**Figure S2.** Densitometric analysis of immunoblotting reported in Figure 1E was performed through ImageJ and the histograms are the results of the quantitation of the signals from two independent experiments (standard deviations are reported). The undigested protein was rated as 100% in each analysis and GAPDH was exploited as a loading normalizer.

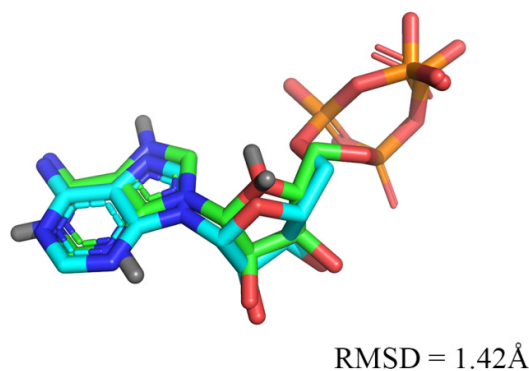

**Figure S3.** The docking analysis of ADP on CPS1 carried out using the identical experimental parameters employed in PXA one. The superimposition here reported shows the light blue stick ADP from 5dou in comparison with the green stick of ADP conformation obtained by docking analysis. Root-mean-square deviation (RMSD) has also been reported.

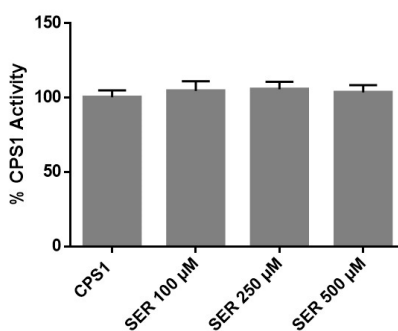

**Figure S4.** CPS1 activity measured by the reported assay in presence of another natural compound (Serratol) as control.
